# Supplementary material
Source: PubMed Central journal article supplement (PMC3431183)
Supplement: neo1408_0771SD1.pdf [file neo1408_0771SD1.pdf]

**Table W1.** The IC<sub>50</sub> Value of VA Was Determined in a Panel of CCRCC and Non-CCRCC Cell Lines.

| Cell Line | IC <sub>50</sub> ( <i>VHL</i> <sup>-/-</sup> ) (nM) | IC <sub>50</sub> ( <i>VHL</i> <sup>+/+</sup> ) (μM) |
|-----------|-----------------------------------------------------|-----------------------------------------------------|
| 786-O     | 3.32                                                | 1.42                                                |
| UOK-121   | 30.10                                               | 37.34                                               |
| UOK-127   | 50.20                                               | 29.52                                               |
| RCC4      | 12.54                                               | 33.44                                               |
| UO-31*    |                                                     | 9.82                                                |
| A498      | 43.74                                               |                                                     |
| SN12C*    |                                                     | 23.65                                               |
| ACHN*     |                                                     | 23.30                                               |

A498VHL cell line was not generated, and therefore, its IC<sub>50</sub> value was not determined.  
\*Non-CCRCC cell lines.

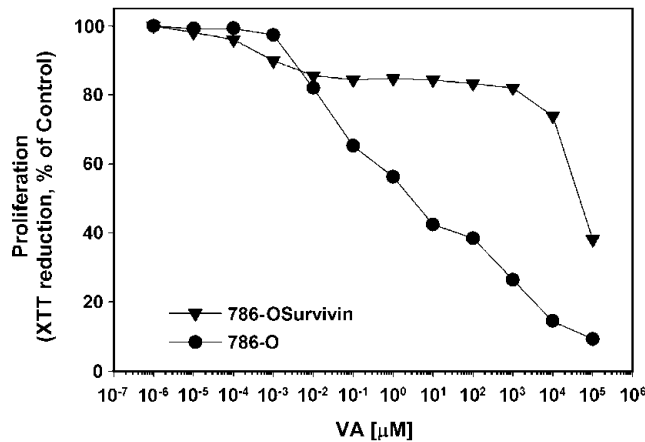

**Figure W1.** Overexpression of survivin in the CCRCC cell line 786-O increased resistance to apoptosis by VA. 786-O cells were transiently transfected with the expression vector pcDNA3-HA-Survivin (catalog no. 1311002; CH3 BioSystems, Amherst, NY) to generate 786-OSurvivin cells. As a control, 786-O cells were transfected with the empty pcDNA3-HA vector (shown in the graph as 786-O).

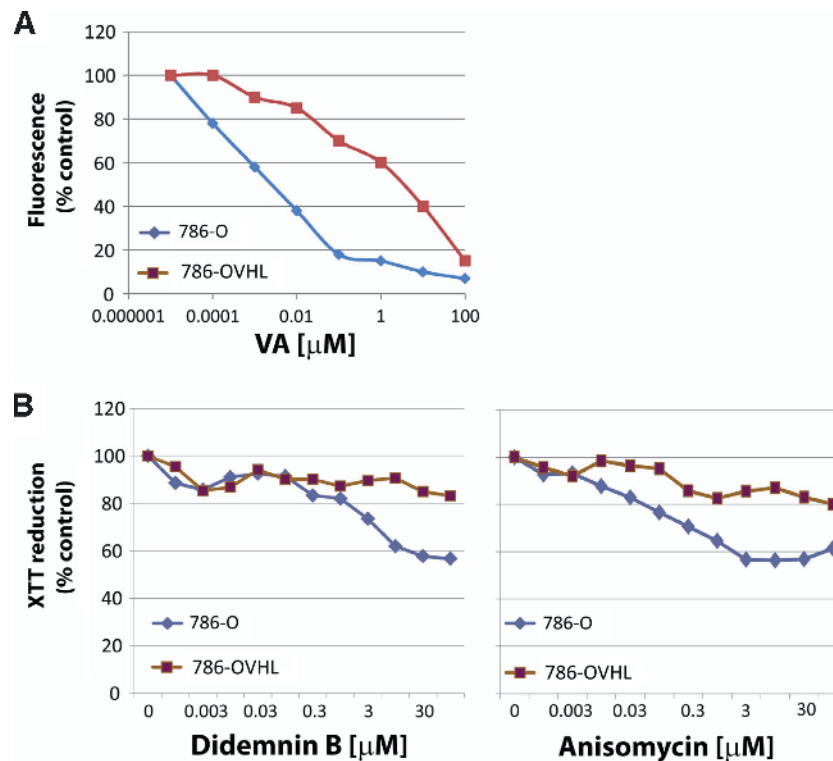

**Figure W2.** Differential effect of small-molecule protein synthesis inhibitors on protein synthesis and proliferation in 786-O and 786-OVHL cells. (A) VA shows a differential effect on protein synthesis between 786-O and 786-OVHL cells. Cells being grown in 12-well plates were incubated in fresh methionine-free growth medium for 30 minutes. The medium was replaced with either control or VA containing methionine-free medium supplemented with 50  $\mu\text{M}$  L-azidohomoalanine, and cells were further incubated for 30 minutes. After washing, cells were then labeled in the dark with DIBO–Alexa Fluor-488 at room temperature for 1 hour. Finally, fluorescence from wells was measured in PBS. (B) Of the different protein synthesis inhibitors tested, only didemnin B and anisomycin showed differential growth inhibitory effect between 786-O and 786-OVHL cells.
